# Supplementary material for: The antigenic switching network of Plasmodium falciparum and its implications for the immuno-epidemiology of malaria
Source: eLife. 2013 Sep 17;2:e01074. doi: 10.7554/eLife.01074 (PMC3778436; doi:10.7554/eLife.01074)
Supplement: Figure 2—source data 1. — Mean switch biases from gene i (row) to gene j (column) for the 16 most transcribed var genes, together with the 95% credible intervals. DOI: http://dx.doi.org/10.7554/eLife.01074.008 [file elife01074s001.xls]

## Sheet: table
	var29	var27	var35	var28	var31	var36	var34	var30	var13	var19	var24	var26	var17	var7	var5	var11
var29	-	0.36	0.18	0.073	0.053	0.053	0.051	0.016	0.0068	0.031	0.055	0.039	0.029	0.04	0.0024	0.013
	-	(22,53)	(7.4,33)	(2.3,14)	(2.3,9.7)	(1.5,11)	(1.1,11)	(0.21,3.7)	(0.051,1.8)	(0.55,7)	(1.7,11)	(0.7,8.3)	(0.55,6.3)	(0.86,8.3)	(0.014,0.66)	(0.56,2.5)
var27	0.4	-	0.065	0.19	0.016	0.026	0.059	0.02	0.046	0.06	0.012	0.027	0.043	0.02	0.011	0.0077
	(29,51)	-	(2.5,11)	(11,28)	(0.45,3.2)	(0.59,5.3)	(2.7,10)	(0.68,3.6)	(2.9,7)	(3,11)	(0.16,2.6)	(0.79,5.1)	(2.3,6.9)	(0.4,4)	(0.66,1.8)	(0.37,1.3)
var35	0.32	0.2	-	0.12	0.015	0.047	0.052	0.013	0.0035	0.015	0.053	0.06	0.048	0.034	0.011	0.0052
	(17,51)	(8.9,35)	-	(6.1,22)	(0.12,3.7)	(0.93,10)	(1.1,13)	(0.1,3.3)	(0.011,1.1)	(0.094,4.1)	(1.8,10)	(1.6,12)	(1.7,8.8)	(0.64,7.5)	(0.43,1.9)	(0.074,1.2)
var28	0.59	0.15	0.062	-	0.0078	0.018	0.019	0.015	0.08	0.0081	0.011	0.011	0.013	0.0084	0.00097	0.007
	(42,76)	(5.2,28)	(1.4,12)	-	(0.074,1.9)	(0.25,4.2)	(0.3,4.7)	(0.39,3.5)	(4.6,12)	(0.051,2.3)	(0.11,2.8)	(0.079,3.3)	(0.14,3.1)	(0.049,2.4)	(0.0041,0.29)	(0.29,1.3)
var31	0.3	0.34	0.12	0.019	-	0.019	0.063	0.019	0.0022	0.019	0.038	0.023	0.012	0.022	0.0019	0.004
	(14,44)	(21,50)	(5.6,20)	(0.11,5.4)	-	(0.21,4.7)	(2.4,11)	(0.51,3.6)	(0.0084,0.68)	(0.33,4.4)	(1.4,7.2)	(0.4,5.2)	(0.098,3.1)	(0.45,4.4)	(0.013,0.51)	(0.094,0.82)
var36	0.12	0.15	0.16	0.061	0.059	-	0.085	0.051	0.018	0.058	0.065	0.057	0.046	0.052	0.011	0.01
	(0.48,43)	(0.8,47)	(0.7,45)	(0.18,23)	(0.28,20)	-	(0.36,26)	(0.15,15)	(0.05,5.9)	(0.22,16)	(0.22,25)	(0.15,18)	(0.16,15)	(0.21,18)	(0.029,4)	(0.027,3.2)
var34	0.13	0.11	0.16	0.08	0.055	0.081	-	0.046	0.013	0.073	0.052	0.073	0.041	0.06	0.01	0.0091
	(0.55,51)	(0.23,39)	(0.86,47)	(0.42,25)	(0.24,19)	(0.3,27)	-	(0.16,14)	(0.03,4.4)	(0.22,24)	(0.17,18)	(0.25,24)	(0.13,13)	(0.33,19)	(0.03,3.6)	(0.028,3.2)
var30	0.16	0.29	0.064	0.21	0.022	0.031	0.0092	-	0.092	0.026	0.01	0.028	0.028	0.022	0.0013	0.0073
	(4.1,29)	(14,47)	(1.9,14)	(9.6,36)	(0.73,4.2)	(0.77,6.6)	(0.04,2.6)	-	(4.8,15)	(0.74,5.5)	(0.081,2.7)	(0.7,6.3)	(0.88,5.6)	(0.48,5.1)	(0.008,0.36)	(0.26,1.4)
var13	0.26	0.25	0.1	0.068	0.029	0.08	0.037	0.016	-	0.011	0.043	0.018	0.02	0.052	0.0085	0.0078
	(16,40)	(15,34)	(4.2,17)	(3.3,12)	(1.3,4.9)	(3.9,14)	(1,7.3)	(0.42,3)	-	(0.065,2.8)	(1.9,7.3)	(0.25,4.1)	(0.38,4.1)	(2.6,8.4)	(0.38,1.4)	(0.36,1.3)
var19	0.11	0.11	0.12	0.1	0.06	0.072	0.092	0.06	0.022	-	0.051	0.063	0.053	0.06	0.012	0.014
	(0.24,51)	(0.26,40)	(0.31,46)	(0.26,39)	(0.2,23)	(0.23,23)	(0.3,36)	(0.17,20)	(0.068,7.3)	-	(0.13,19)	(0.14,24)	(0.2,18)	(0.22,20)	(0.032,4.4)	(0.038,5)
var24	0.16	0.11	0.15	0.078	0.05	0.074	0.067	0.044	0.016	0.053	-	0.07	0.054	0.053	0.011	0.012
	(0.55,56)	(0.53,40)	(0.53,54)	(0.29,26)	(0.14,15)	(0.28,22)	(0.26,23)	(0.12,15)	(0.047,5.3)	(0.2,17)	-	(0.19,25)	(0.18,18)	(0.13,20)	(0.029,3.6)	(0.037,4.5)
var26	0.11	0.14	0.14	0.085	0.055	0.084	0.098	0.044	0.017	0.059	0.049	-	0.046	0.051	0.01	0.012
	(0.26,52)	(0.29,55)	(0.62,45)	(0.24,27)	(0.16,19)	(0.19,30)	(0.26,33)	(0.13,15)	(0.052,6)	(0.18,20)	(0.16,17)	-	(0.14,15)	(0.18,18)	(0.029,4.2)	(0.033,4.1)
var17	0.11	0.11	0.12	0.081	0.053	0.077	0.084	0.054	0.021	0.058	0.056	0.073	-	0.074	0.01	0.014
	(0.33,48)	(0.33,48)	(0.3,45)	(0.19,30)	(0.21,19)	(0.23,26)	(0.29,31)	(0.17,18)	(0.064,7.7)	(0.17,19)	(0.18,19)	(0.28,25)	-	(0.32,23)	(0.03,3.4)	(0.04,4.6)
var7	0.14	0.13	0.13	0.087	0.056	0.073	0.076	0.041	0.019	0.072	0.052	0.061	0.053	-	0.012	0.011
	(0.35,53)	(0.43,41)	(0.33,51)	(0.24,28)	(0.27,19)	(0.22,26)	(0.2,23)	(0.14,16)	(0.064,6.9)	(0.28,22)	(0.15,18)	(0.24,20)	(0.18,21)	-	(0.036,4.1)	(0.031,4.1)
var5	0.13	0.32	0.14	0.039	0.05	0.045	0.047	0.02	0.02	0.018	0.075	0.029	0.025	0.023	-	0.013
	(5.1,24)	(18,46)	(5.4,27)	(0.58,9)	(2.4,8.6)	(1.2,9)	(1.4,10)	(0.41,3.9)	(0.76,3.5)	(0.26,4.1)	(3.2,14)	(0.39,7)	(0.39,5.4)	(0.39,5.2)	-	(0.6,2.3)
var11	0.38	0.3	0.05	0.067	0.014	0.04	0.026	0.026	0.0063	0.01	0.027	0.012	0.014	0.025	0.0033	-
	(21,60)	(14,46)	(1.3,11)	(2.4,13)	(0.29,2.9)	(1.2,8.7)	(0.57,5.8)	(1,4.8)	(0.051,1.7)	(0.091,2.7)	(0.89,5.4)	(0.085,3)	(0.17,3.6)	(0.63,5.2)	(0.07,0.71)	-
